# Supplementary material for: Chemopreventive effect of resveratrol and apocynin on pancreatic carcinogenesis via modulation of nuclear phosphorylated GSK3β and ERK1/2
Source: PubMed Central journal article supplement (PMC4767484; doi:10.18632/oncotarget.5981), 2015-10-19
Supplement: oncotarget-06-42963-s001.pdf [file oncotarget-06-42963-s001.pdf]

## SUPPLEMENTARY FIGURES AND TABLES

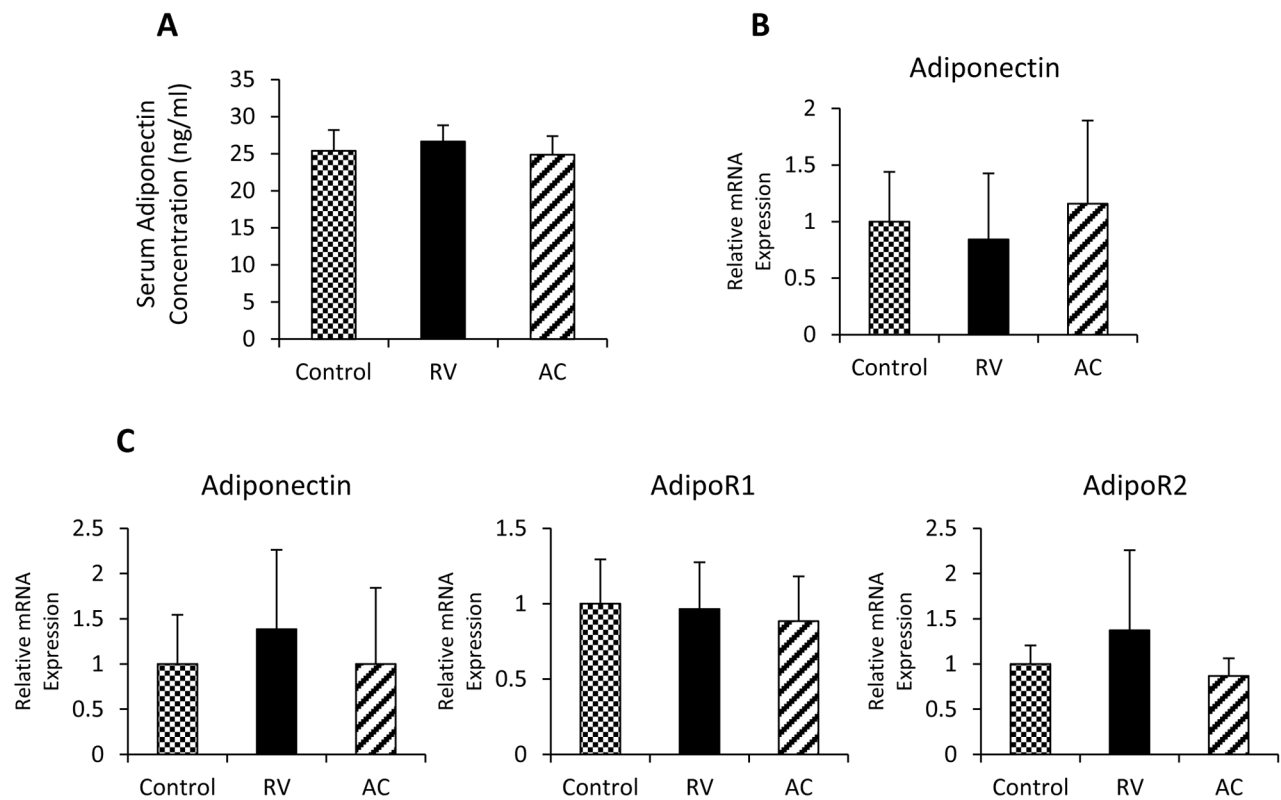

**Supplementary Figure S1: The level of endogenous adiponectin in hamsters treated with RV and AC.** **A.** Serum adiponectin (R&D Systems, Minneapolis, MN) was examined using enzyme-linked immunosorbent assay kits according to the manufacture's instructions. **B.** and **C.** Expression analyses of the genes encoding for adiponectin in the visceral fat tissue (**B**), and adiponectin, adipoR1 and adipoR2 in the pancreatic tissue (**C**) of hamsters were conducted by quantitative RT-PCR. The amount of mRNA was normalized and shown relative to that of cyclophilin mRNA in each sample.

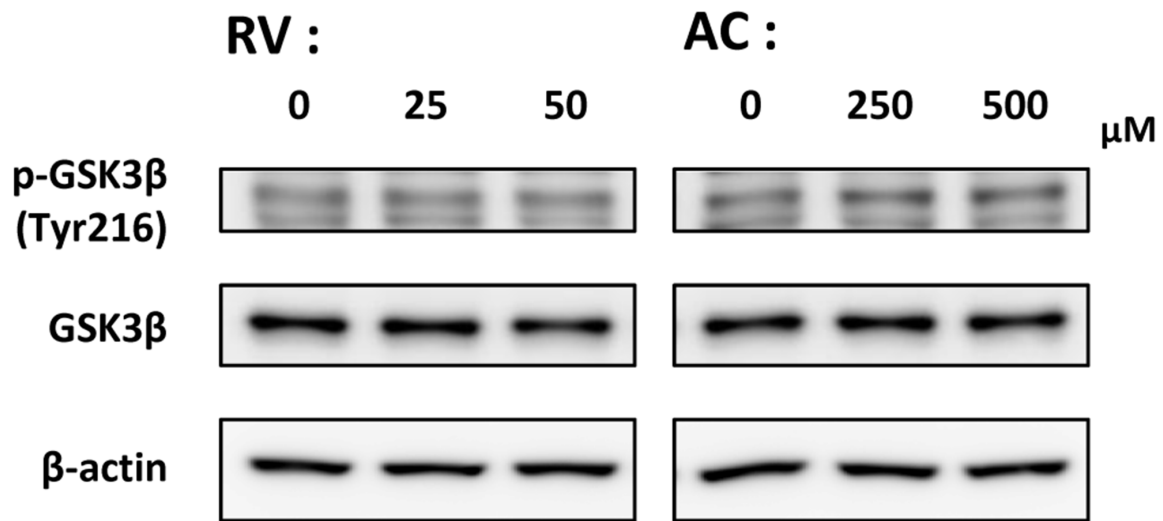

Supplementary Figure S2: Western blot analysis for phosphorylated GSK3β<sup>Tyr216</sup> in RV- and AC-treated AsPC1 cells. RV and AC did not affect Tyr216-phosphorylated GSK3β.

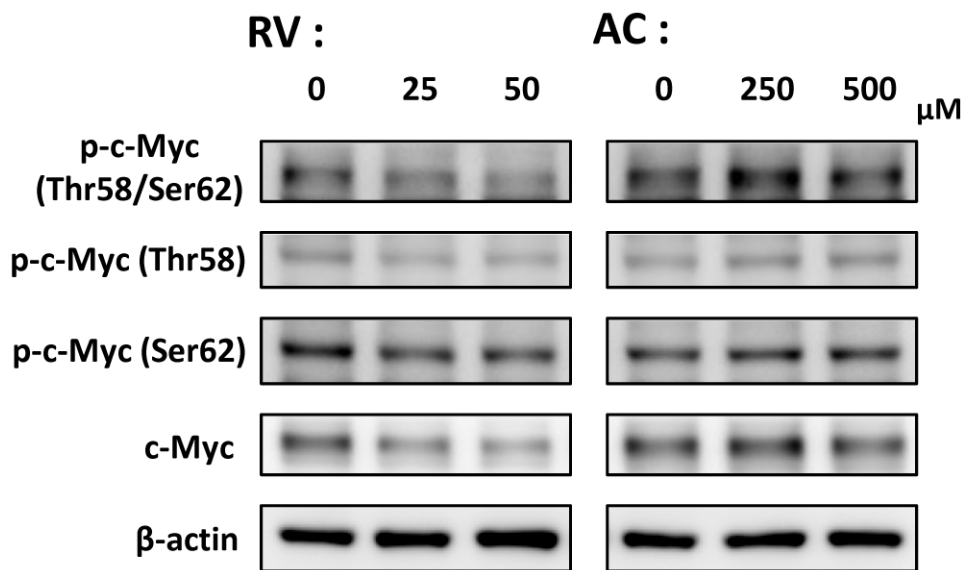

Supplementary Figure S3: The expression of phosphorylated c-Myc in RV- and AC-treated AsPC1 cells. Western blot analysis using total c-Myc and single and cocktail antibodies for Thr58- and Ser62-phosphorylated c-Myc. The results demonstrated are representative of three independent experiments.

Supplementary Table S1: The blood glucose levels and the serum levels of triglyceride, total cholesterol, LDL cholesterol, HDL cholesterol, free fatty acid and amylase in hamsters

| Group        | Blood glucose (mg/dl) | Triglyceride (mg/dl) | Total cholesterol (mg/dl) | LDL cholesterol (mg/dl) | HDL cholesterol (mg/dl) | Free fatty acid (mEq/l) | Amylase (U/l)  |
|--------------|-----------------------|----------------------|---------------------------|-------------------------|-------------------------|-------------------------|----------------|
| Control (13) | 142.0 ± 52.5          | 483.8 ± 148.4        | 300.2 ± 49.8              | 98.3 ± 39.6             | 144.8 ± 17.8            | 3.3 ± 0.6               | 3718.8 ± 515.0 |
| RV (12)      | 129.3 ± 25.2          | 476.8 ± 90.8         | 277.1 ± 26.6              | 90.2 ± 17.6             | 136.7 ± 19.7            | 3.7 ± 0.4               | 3838.5 ± 686.3 |
| AC (12)      | 121.9 ± 35.7          | 524.4 ± 133.2        | 274.8 ± 24.6              | 75.3 ± 11.7             | 144.0 ± 12.3            | 3.8 ± 0.6               | 3480.8 ± 500.4 |

RV, Resveratrol; AC, Apocynin

**Supplementary Table S2: The sub-G1 cell population in AsPC1 cells treated with RV or AC**

|                  | RV ( $\mu$ M)  |                  |                  | AC ( $\mu$ M)  |                |                |
|------------------|----------------|------------------|------------------|----------------|----------------|----------------|
|                  | 0              | 25               | 50               | 0              | 250            | 500            |
| Sub-G1 phase (%) | 13.3 $\pm$ 1.2 | 22.5 $\pm$ 3.8 * | 21.4 $\pm$ 3.9 * | 10.8 $\pm$ 2.8 | 12.0 $\pm$ 2.3 | 12.1 $\pm$ 0.5 |

RV, Resveratrol; AC, Apocynin

Values are means  $\pm$  SD from three independent experiments

\* $P < 0.05$  as compared to controls.

**Supplementary Table S3: Patients' characteristics**

|                  | Nuclear p-GSK3 $\beta$ expression |                           | <i>P</i> value |
|------------------|-----------------------------------|---------------------------|----------------|
|                  | Positive ( <i>n</i> = 41)         | Negative ( <i>n</i> = 15) |                |
| Gender           |                                   |                           |                |
| Male/female      | 29 / 12                           | 9 / 6                     | 0.567          |
| Age              |                                   |                           |                |
| Median (range)   | 67.4 (32–84)                      | 65.9 (48–79)              | 0.635          |
| Differentiation  |                                   |                           |                |
| Well             | 18                                | 8                         | 0.819          |
| moderate         | 20                                | 6                         |                |
| Poorly           | 3                                 | 1                         |                |
| Stage            |                                   |                           |                |
| IA, IB, IIA, IIB | 29                                | 7                         | 0.177          |
| III, IV          | 12                                | 8                         |                |
| T                |                                   |                           |                |
| 1, 2             | 7                                 | 2                         | 0.138          |
| 3, 4             | 33                                | 13                        |                |
| N                |                                   |                           |                |
| 0                | 20                                | 5                         | 0.527          |
| 1                | 21                                | 10                        |                |
| M                |                                   |                           |                |
| 0                | 38                                | 13                        | 0.489          |
| 1                | 3                                 | 2                         |                |
